# Supplementary material
Source: publisher figshare collection journal article supplement (https://sage.figshare.com/ndownloader/files/38582691)
Supplement: Supplementary file 1 [file 38582691]

**STRUCTURED QUESTIONAIRE**

**Part 1- socio-demographic status**

1. Age of the patient
2. Sex of the patient male female
3. Site of the lymphadenopathy cervical submandibular axillary mesenteric inguinal generalized
4. Size of lymph node <=1cm 1.1-3cm 3.1-6cm >6cm
5. Duration of lymphadenopathy <1/2 month ½-1 month 2-6 month >6 month

**Part 2- type and characterstics of pathologies**

1. Type of diagnosis

1.1 Reactive lymphadenopathy

1.2 Tuberculous lymphadenitis

1.3 Hodgkin’s lymphoma

1.4 Non-hodgkin’s lymphoma low grade intermediate grade high

grade

1.5 Metastasis squamous cell carcinoma adenocarcinoma

melanoma sarcoma others

1.6 others specify…………………………………………………….
